# Supplementary material for: p38 Mitogen-Activated Protein Kinase Inhibition of Mesenchymal Transdifferentiated Tumor Cells in Head and Neck Squamous Cell Carcinoma
Source: MDPI journal article supplement (doi:10.3390/biomedicines11123301), 2023-12-13
Supplement: s1 [file s1]

**Supplementary Figure S1: SB202190 and TGF-beta-1 effects on normalized p-ATF2 phosphoprotein levels in SCC-25 cells.**

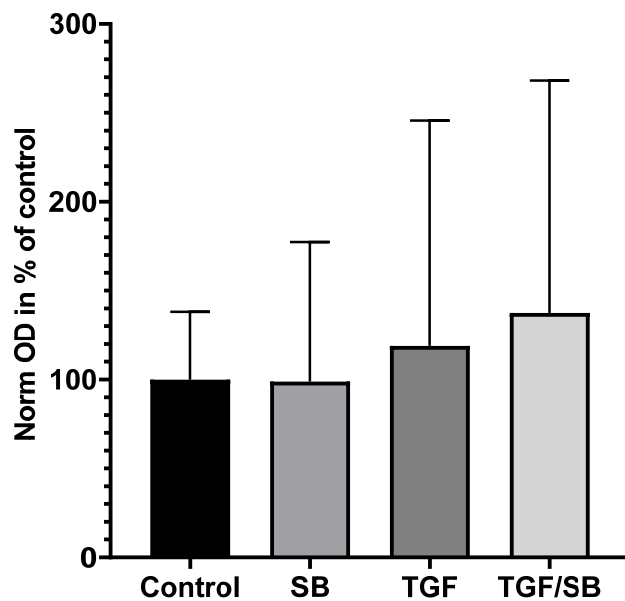

Figure S1. SCC-25 cells were treated with DMEM/F12 control medium (1), SB202190 (2), TGF-beta-1 (3) and TGF-beta-1 plus SB202190 (4). p-ATF2 protein was analyzed by Western blot in 10 independent biological repeats. Immunoblotting reactions were visualized by highly sensitive horseradish peroxidase (HRP)-labeled secondary antibodies and chemiluminescent substrate reaction. GAPDH was used as loading control and detected with NIR fluorescence. Phospho-ATF2 optical densities were normalized with those of GAPDH. The normalized optical densities (OD) in all experiments were related to mean of the controls, which was considered 100%. The relative optical densities of control and treatments (n=10 in all cases) are presented on a column chart. No significant differences were found among the control and treatment datasets ( $p=0.84$  by Kruskal-Wallis test).
